# Supplementary figures and images for: CD73 and PD-L1 dual blockade amplifies antitumor efficacy of SBRT in murine PDAC models
Source: PubMed Central journal article supplement — J Immunother Cancer. 2023 May 4;11(5):e006842. doi: 10.1136/jitc-2023-006842 (PMC10163599; doi:10.1136/jitc-2023-006842), 2023-05-04

Supplemental figure 1. Ye et al.

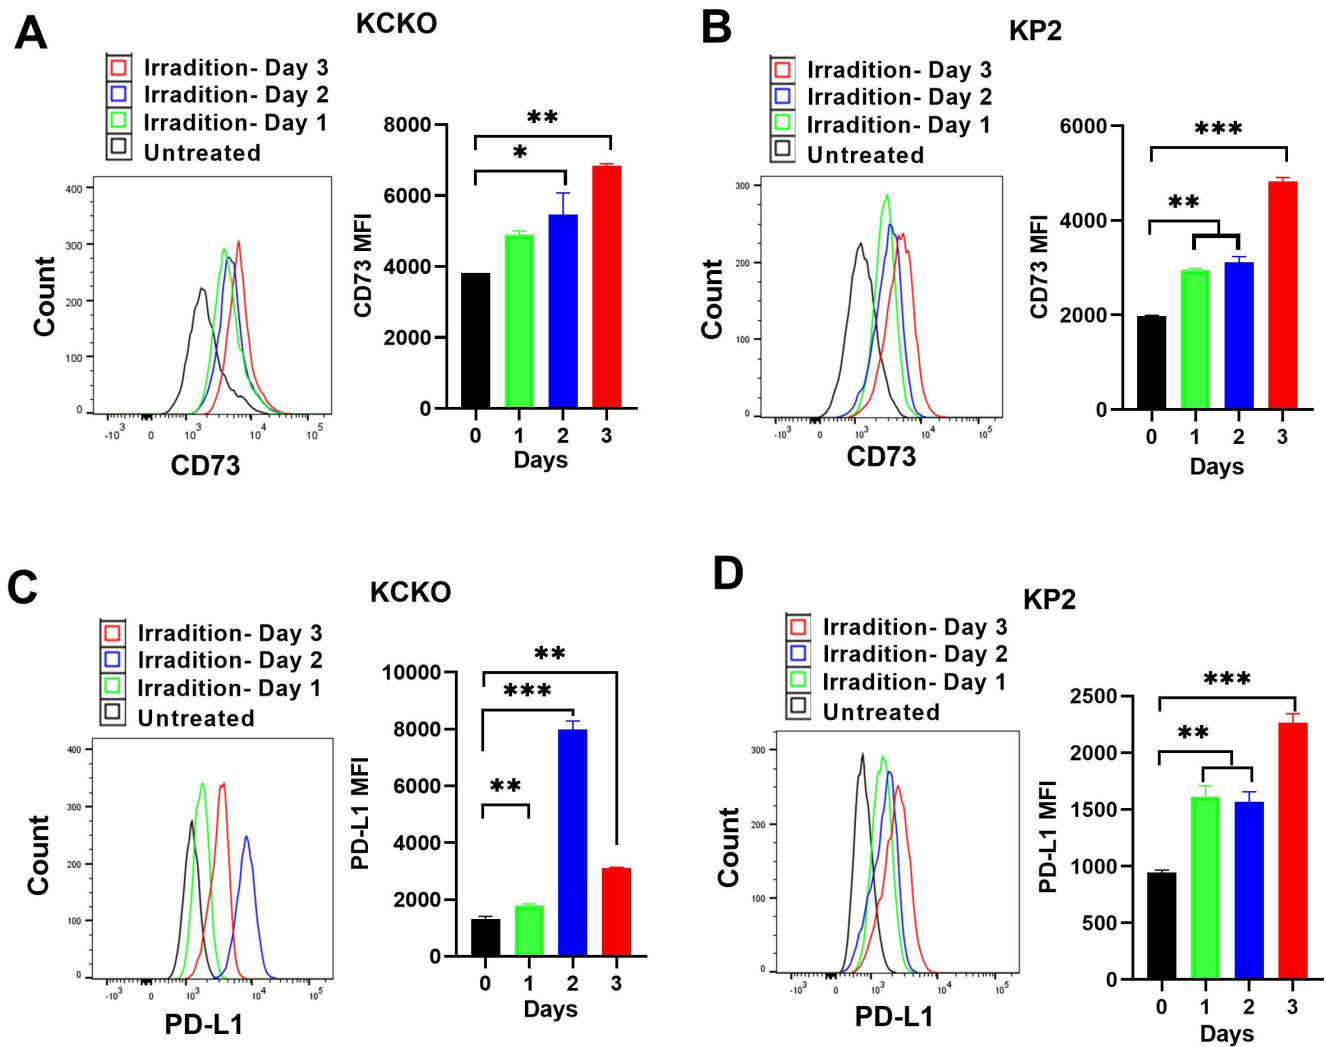

Supplement: jitc-2023-006842supp001.pdf [file jitc-2023-006842supp001.pdf]

## Supplemental figure 2. Ye et al.

A

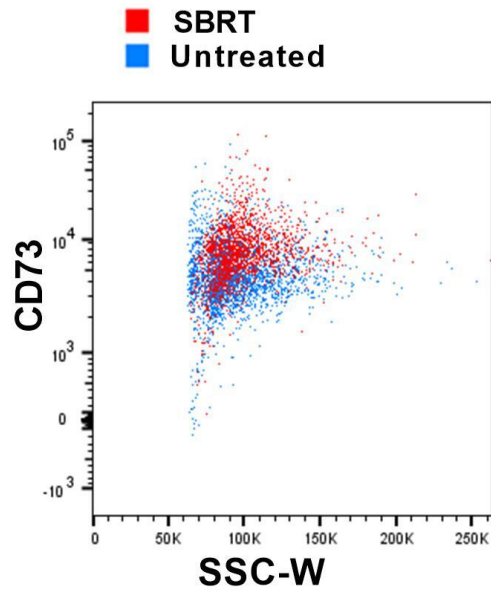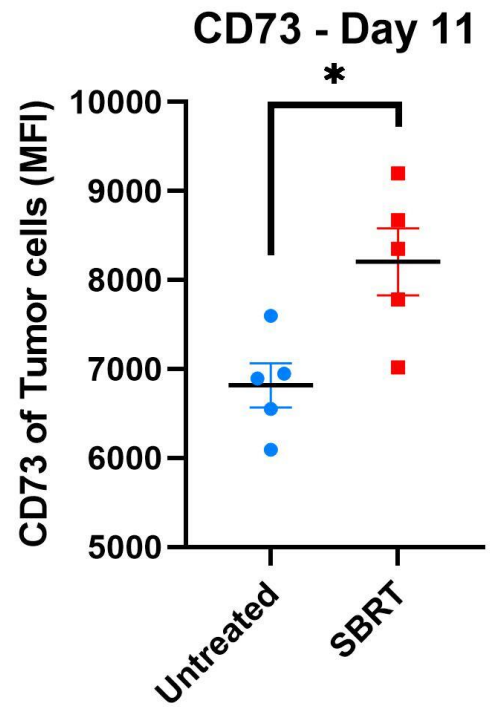

B

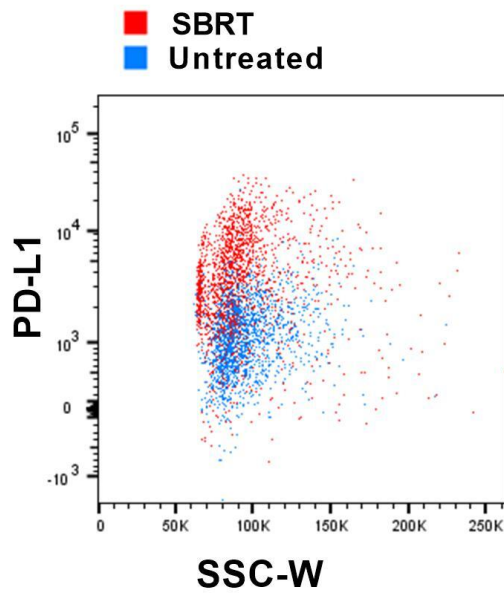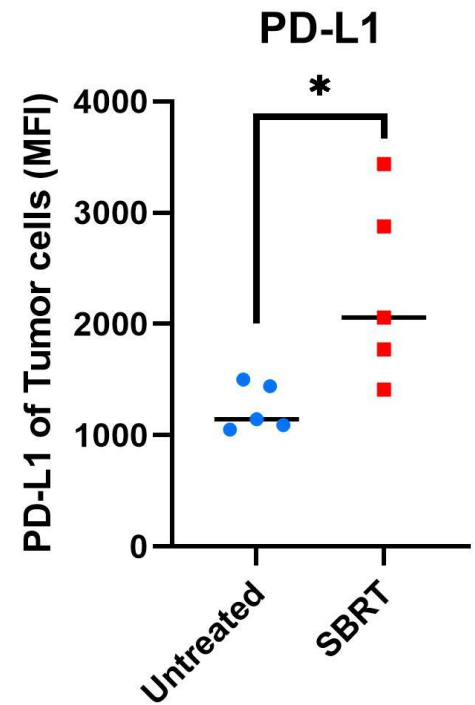

Supplement: jitc-2023-006842supp002.pdf [file jitc-2023-006842supp002.pdf]

Supplemental Figure 3 Ye et al.

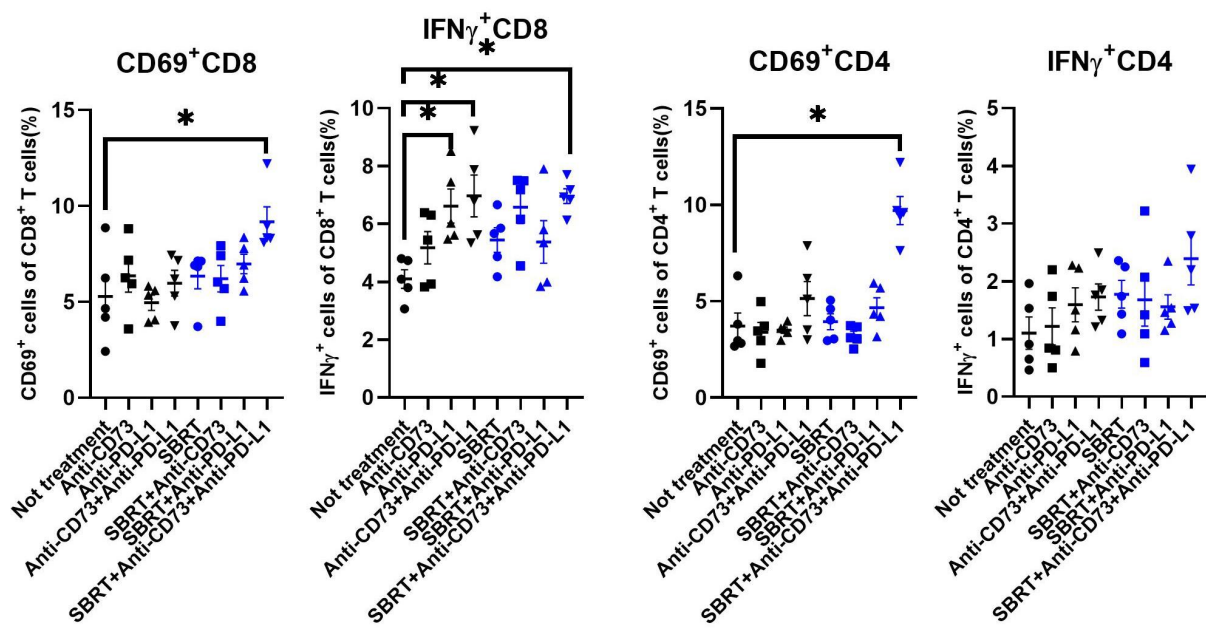

Supplement: jitc-2023-006842supp003.pdf [file jitc-2023-006842supp003.pdf]

## Supplemental figure 4 Ye et al.

## A. T cells gating

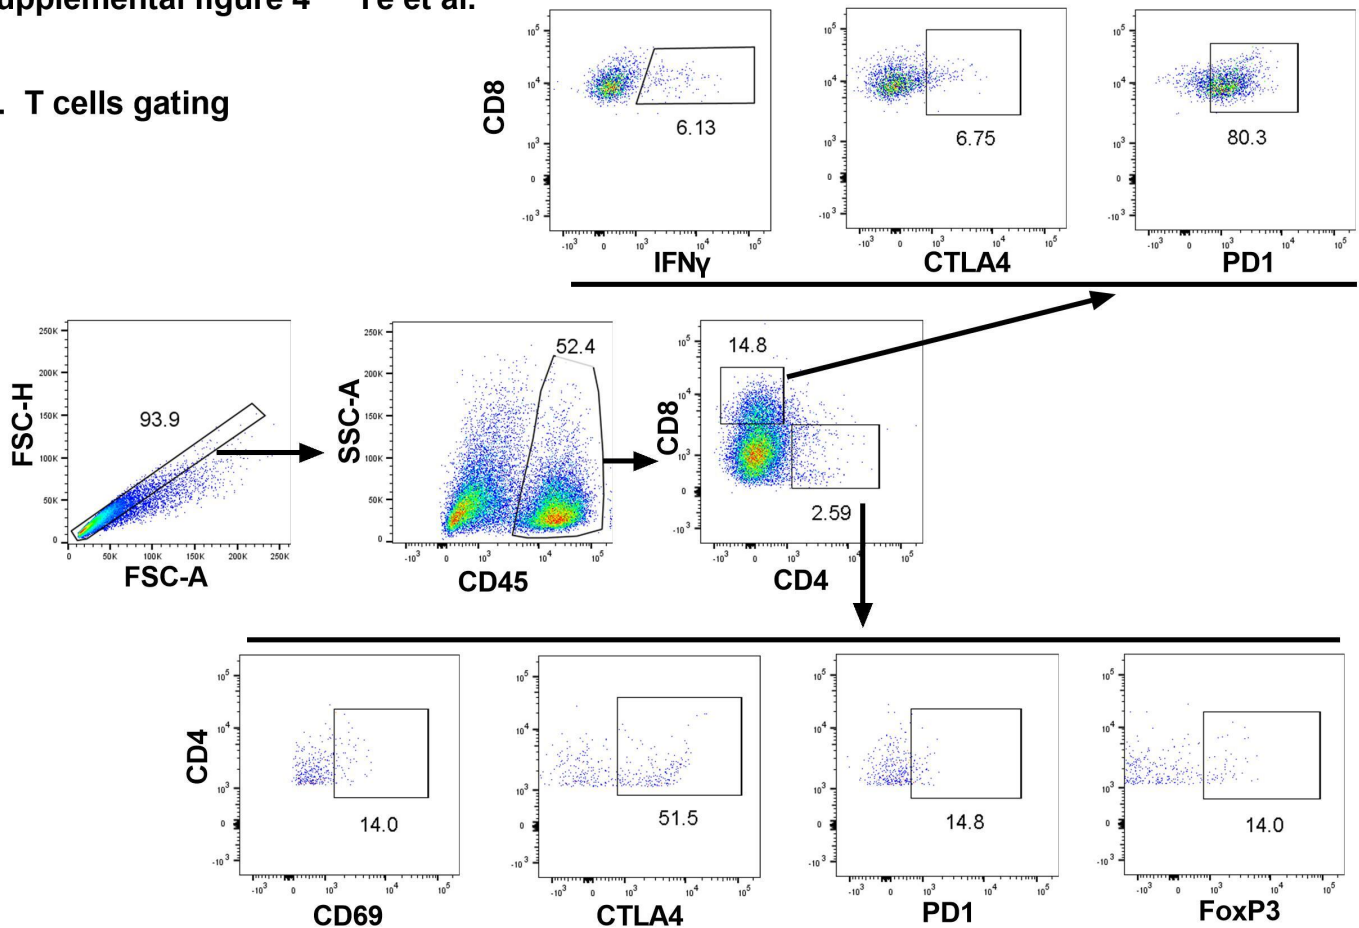

## B. Myeloid cells gating

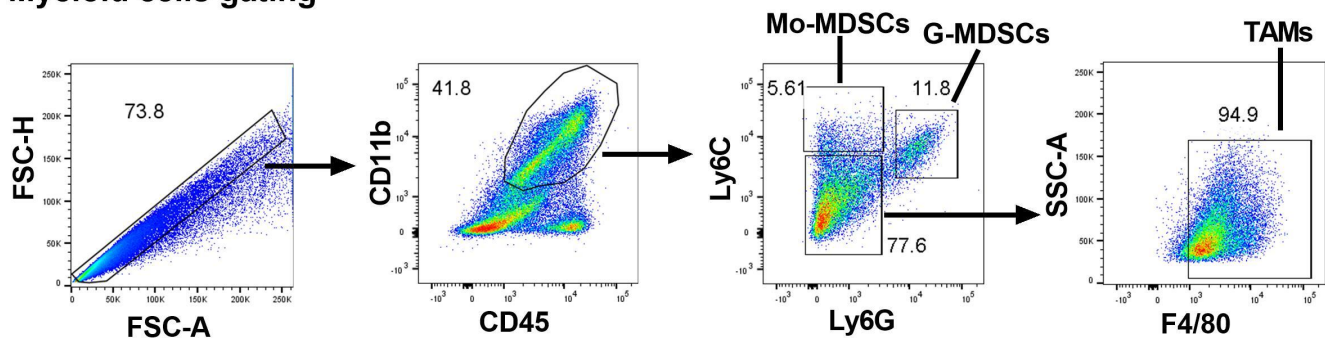

## C. DCs gating

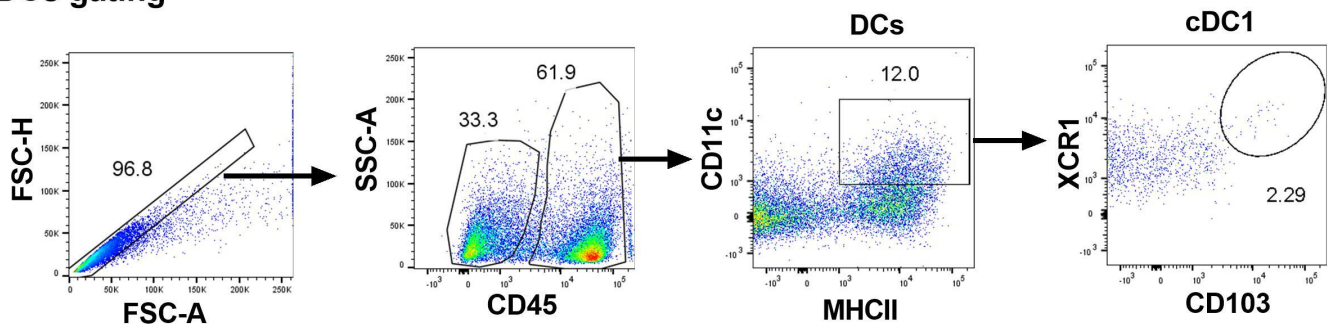

Supplement: jitc-2023-006842supp004.pdf [file jitc-2023-006842supp004.pdf]

## Supplemental figure 5. Ye et al.

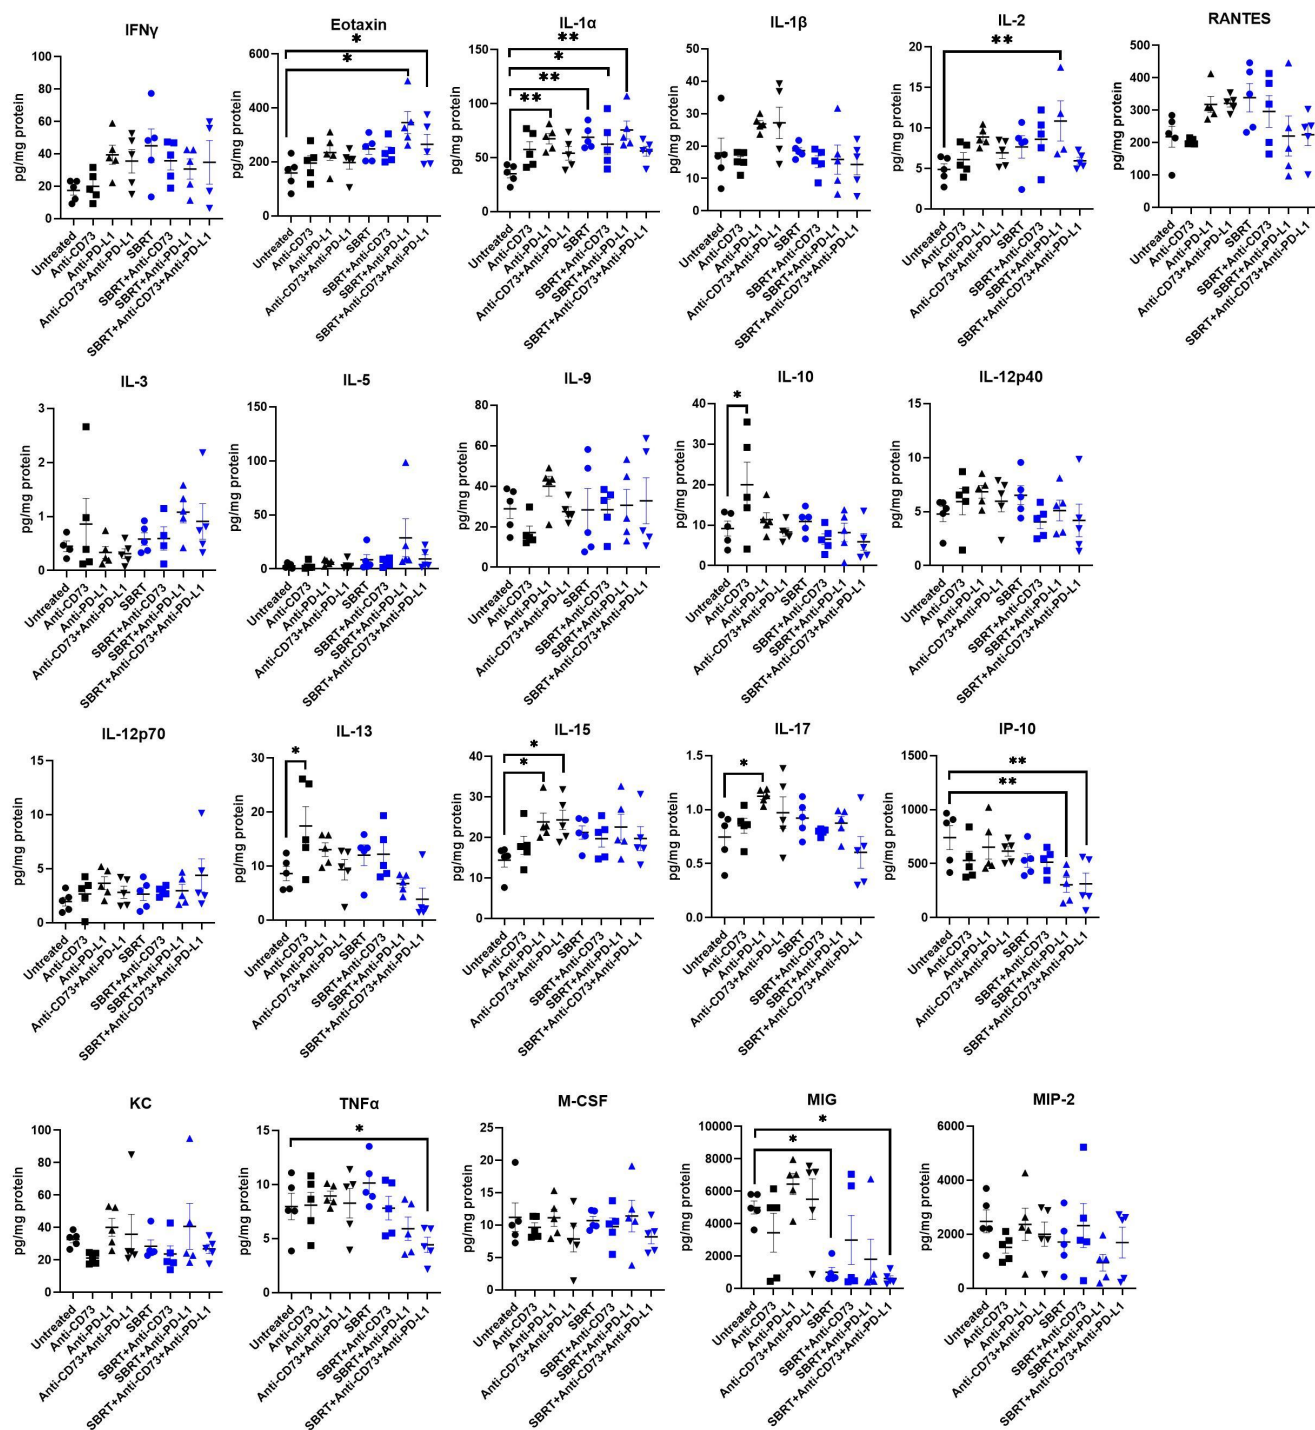

Supplement: jitc-2023-006842supp005.pdf [file jitc-2023-006842supp005.pdf]

## Supplemental figure 6. Ye et al.

A

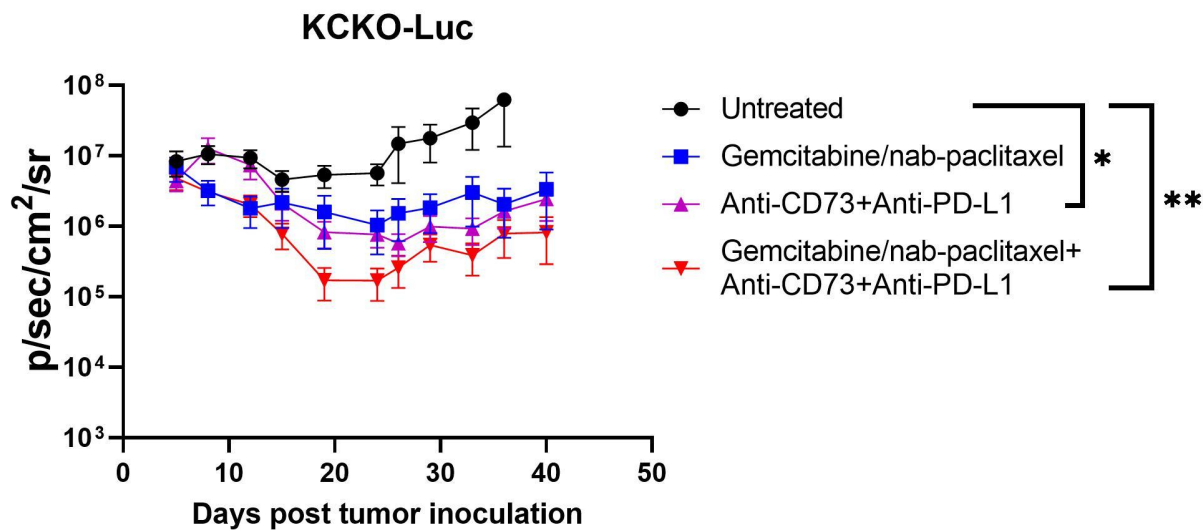

B

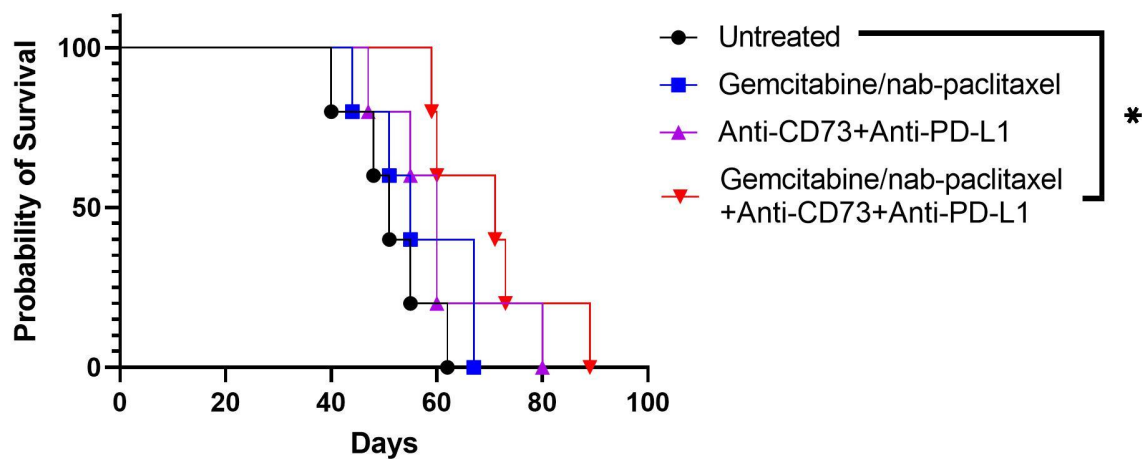

Supplement: jitc-2023-006842supp006.pdf [file jitc-2023-006842supp006.pdf]
